# Supplementary material for: Comprehensive structural variation genome map of individuals carrying complex chromosomal rearrangements
Source: PubMed Central journal article supplement (PMC6368290; doi:10.1371/journal.pgen.1007858), 2019-02-08

# Supplementary Figure S1

## Case 1 - Karyotype

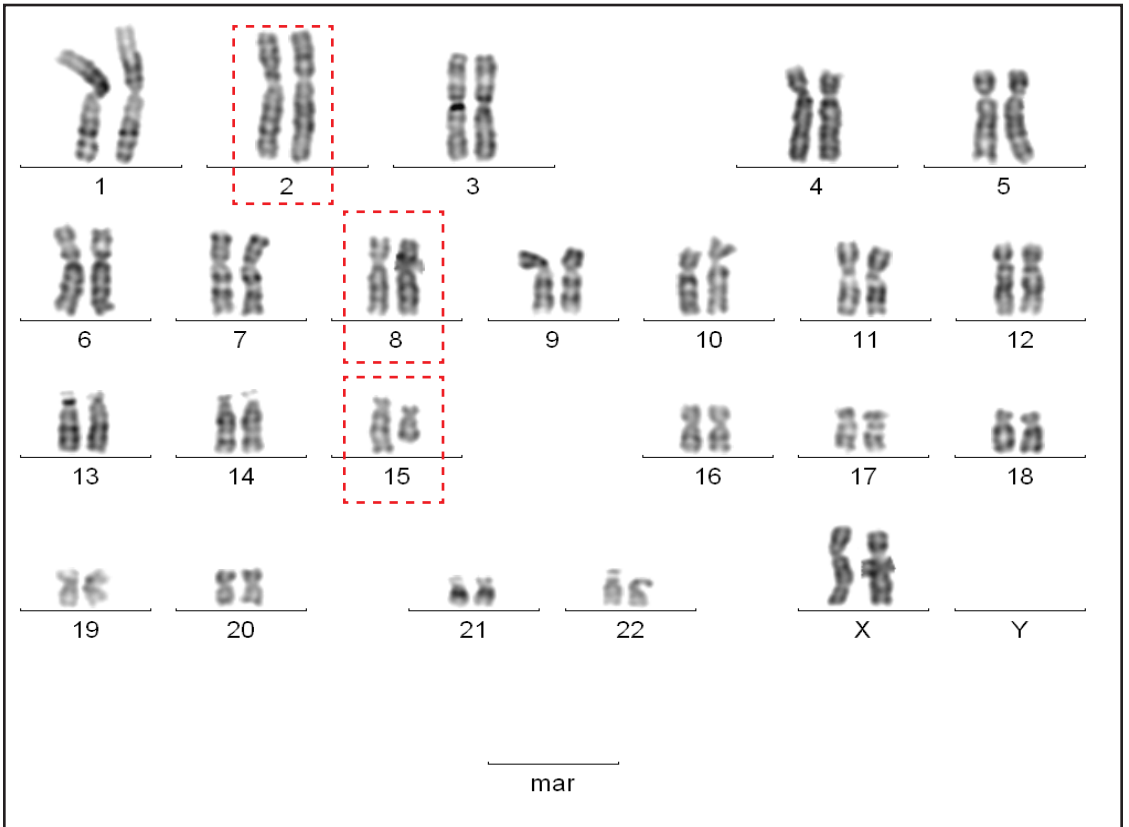

## Case 1 - FISH

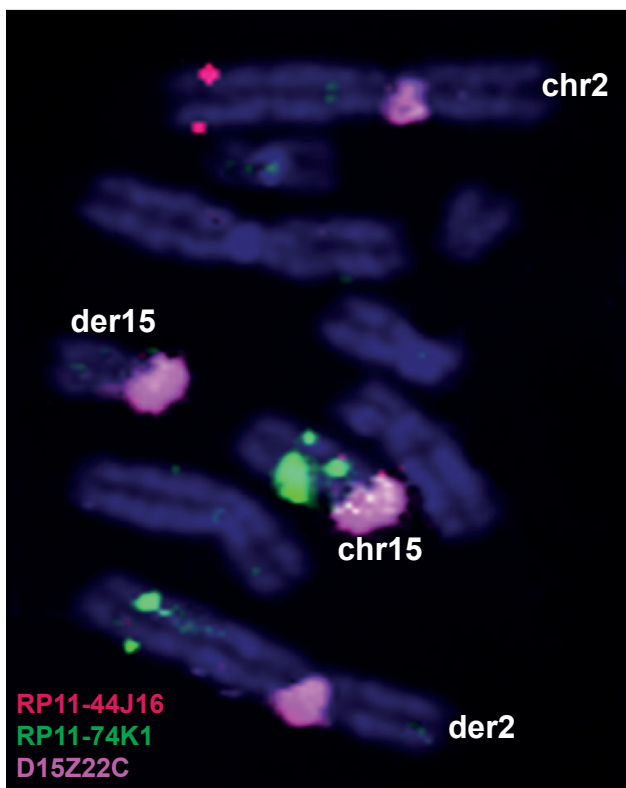

## Case 1 - SKY

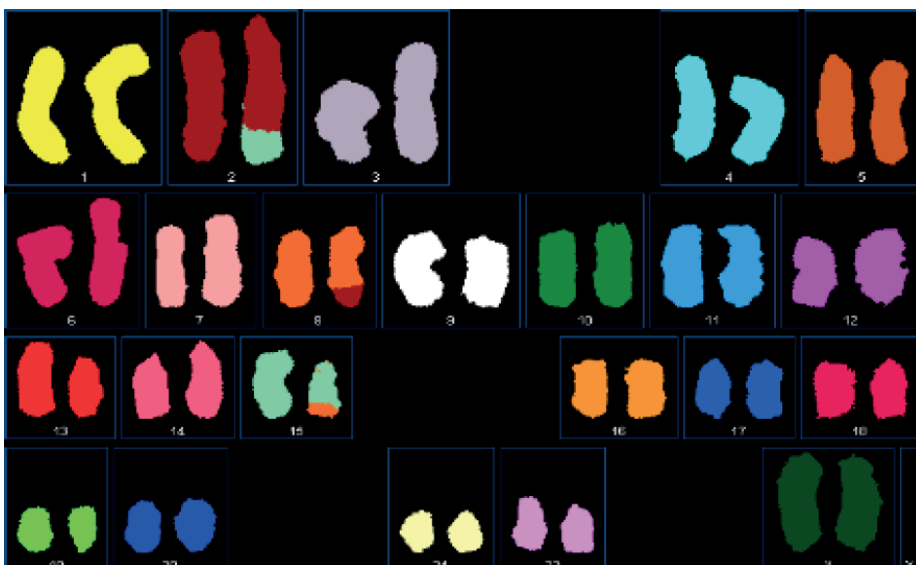

Supplement: pgen.1007858.s001.pdf [file pgen.1007858.s001.pdf]
