# Supplementary material for: Comprehensive structural variation genome map of individuals carrying complex chromosomal rearrangements
Source: PubMed Central journal article supplement (PMC6368290; doi:10.1371/journal.pgen.1007858), 2019-02-08
Supplement: pgen.1007858.s002.pdf [file pgen.1007858.s002.pdf]

Supplementary Figure S2

Case 1

chr2:209425779 (+) ATCCCATGTTTACAGAGTCTACCTACACTCAAAGGGAGGGGATTATACTGGTgagtgaggacaacagtaggtgggaatcttgggggctgaattagtcagggtt  
|||||  
jet1 ATCCCATGTTTACAGAGTCTACCTACACTCAAAGGGAGGGGATTATACTGATAAGTTATGATACATTTGTATGATGCAATAATGCATCCAATGCCATCA  
|||||  
chr15:55083014 (+) ATACCAGGTTTTAAAATGACCACAATGTCCAGTAATAGGAAATTTGGTaaATAAGTTATGATACATTTGTATGATGCAATAATGCATCCAATGCCATCA  
|||||  
chr8:114508037 (+) TTACAGATTGTTCTGCACGCTATGCAAGCACCACCTGAAAGTGGACAGCcatagaactagagactttctgtgcaacatccttgaaggatgggtggaaga  
|||||  
jet2 TTACAGATTGTTCTGCACGCTATGCAAGCACCACCTGAAAGTGGACAGCAGCGGAAGCAAGGCTAATGGTCATTTTGGAGGGAGGAGTATGAGGAGGCTTG  
|||||  
chr2:214880325 (+) aaaaaaaaaaatacaagaaagaagggtggttctgtttagcacttaGGGAAGCAAGGCTAATGGTCATTTTGGAGGGAGGAGTATGAGGAGGCTTG  
|||||  
chr15:55083014 (+) ATACCAGGTTTTAAAATGACCACAATGTCCAGTAATAGGAAATTTGGTaaATAAGTTATGATACATTTGTATGATGCAATAATGCATCCAATGCCATCA  
|||||  
jet3 ATACCAGGTTTTAAAATGACCACAATGTCCAGTAATAGGAAATTTGGTCTACTAATGTATAGCTCCAAGCACCACCTCTTATCTTGATCTCAAGATGTACA  
|||||  
chr2:211580791 (-) ACTAATGCACTATGAATACAATAAGTACTATAAACTTTGTAATTTCTACTAATGTATAGCTCCAAGCACCACCTCTTATCTTGATCTCAAGATGTACA  
|||||  
chr2:212551722 (+) GCGTGGTGGCTCATGCCTGTAATCCCAGCACTTTGGGAGGCCAAGTGGTGGatcacagaggtcaggagatcgagaccatcctgggctaacaatgggtgaaa  
|||||  
jet4 GCGTGGTGGCTGCCTGTAATCCCAGCTACTTTGGGAGGCCAAGGCGAGGAGTGTTCAGCCACTGTTGGATGAATGGAGAAATGACTCAATGAATTTT  
|||||  
chr8:129039953 (+) tgttctgccccagctaggtttctcagcactactgagtgtggtcatggtGAGTGTTCAGCCACTGTTGGATGAATGGAGAAATGACTCAATGAATTTT  
|||||  
chr2:211567865 (+) AGGCAAGGAAGATAATCTCCAGCCATGAAGTTGATGAGAAGTTGAAAGTAAAGAAAGACAGGAGGAGCCGATCTCTCCATTTTCAGAGTAGGAAAAAT  
|||||  
jet5 AAATTCACATAATGCACATGAATACAATAAGTACTATAAACTTTGTAAGAAAGACAGGAGGAGCCGATCTCTCCATTTTCAGAGTAGGAAAAAT  
|||||  
chr2:211580775 (-) AAATTCACATAATGCACATGAATACAATAAGTACTATAAACTTTGTAATTTCTACTAATGTATAGCTCCAAGCACCACCTCTTATCTTGATCTCAAG  
|||||

Case 2

chr1:196997295 (+) ACTTAACATAATATTAATATCCTCTAGAATCTTCAAATCATCATGTTGCAACCAACGGGATTTCCCTCTTTTTTAAAGGCTGAATAATATTAATTTGATG  
|||||  
jet1 ACTTAACATAATATTAATATCCTCTAGAATCTTCAAATCATCATGTTGCGAATCAGTCAGGTCATTTACACAAACAGGCACATAGAGCAGATGTGCACAA  
|||||  
chr5:124956684 (+) TTTTAGCTACACTTAAGACTCTTGCAGTGGGAGGAAAGATGAGCTAGAGAAATCAGTCAGGTCATTTACACAAACAGGCACATAGAGCAGATGTGCACAA  
|||||  
chr5:124956684 (+) TAGTTTTAGCTACACTTAAGACTCTTGCAGTGGGAGGAAAGATGAGCTAGAGAAATCAGTCAGGTCATTTACACAAACAGGCACATAGAGCAGATGTGCA  
|||||  
jet2 TAGTTTTAGCTACACTTAAGACTCTTGCAGTGGGAGGAAAGATGAGCTAATTTATAGATTTCATGCCATCCCATCAAGTACCAATAACTTTCTTTAC  
|||||  
chr10:20816175 (-) CATGGGTAGGAAGATCAATATCGTGAATAATGGCCATACTGCCAAGGTAATTTATAGATTTCATGCCATCCCATCAAGCTACCAATAACTTTCTTTAC  
|||||  
chr10:20816175 (-) TGGGTAGGAAGATCAATATCGTGAATAATGGCCATACTGCCAAGGTAATTTATAGATTTCATGCCATCCCATCAAGTACCAATAACTTTCTTTACAG  
|||||  
jet3 TGGGTAGGAAGATCAATATCGTGAATAATGGCCATACTGCCAAGGTAATTTATAGATTTCATGCCATCCCATCAAGCTACCAATAACTTTCTTTAC  
|||||  
chr1:196997295 (+) ACTTAACATAATATTAATATCCTCTAGAATCTTCAAATCATCATGTTGCAACCAACGGGATTTCCCTCTTTTTTAAAGGCTGAATAATATTAATTTGATG  
|||||  
chr10:4689778 (+) CACATCTCTCTCTCTGCTGTGGTCTTCTCACGGCCCTACAAGTCAGAGATAGATTAGGAACACTTAAACAATTTTTCCCTTAGAAGATCAAT  
|||||  
jet4 CACATCTCTCTCTCTGCTGTGGTCTTCTCACGGCCCTACAAGTCATCTTTTTTCTTAATTCACATTTTAAATGTTTTTACATTTTTCATTCATT  
|||||  
chr10:19120835 (+) TTACAATACTCCAGGCTCTTATGTGTACTCATTTCTTATTAATCATCTTTTTTCTTAATTCACATTTTAAATGTTTTTACATTTTTCATTCATT  
|||||

Case 3

chr1:3290849 (+) GGCGCCCCCTTGGCAAAGAGCTTCCACTTGACCATAATGCGGGATCcccttaaaaatgacacatctgtaagctgggatccccgttacagaaatacagtt  
|||||  
jet3 GGCGCCCCCTTGGCAAAGAGCTTCCACTTGACCATAATGCGGGATCTATTAAATCATCAATTCACCAACAATCAATGTTTCCCTTTGAGAGGTAGT  
|||||  
chr1:64810470 (+) GAAACTACCAGGAGGTTTGAAGTCAATTAATAAATAAATAAAGCTATTAAATCATTAACAATTCACCAACAATCAATGTTTCCCTTTGAGAGGTAGT  
|||||  
chr1:3295766 (+) gcacacctctcccagcacaccctcccacacactateccaacacAGTCTCTCCAGCACACCCTCCCAACACACCCTCCCAACACACCCTCCACAGC  
|||||  
jet4 CCAGTTGAATGGTACATGTTAATACATCTTATTAATAAAGGATAGTCCCTCCAGCACACCCTCCCAACACACCCTCCCAACACACCCTCCACAGC  
|||||  
chr1:236176320 (+) CCAGTTGAATGGTACATGTTAATACATCTTATTAATAAAGGATAGactttaatctccatgatgctccatgtaaaaggacagttgtctctttgt  
|||||  
chr1:7682283 (+) CCTCAGGTAGATGGGAGGATCCCACTTTTACCTGGGAGGATACAAAGGcaagaggggttaagtaacttgccaagatcacacagcgtttgaagtggcca  
|||||  
jet5 CCTCAGGTAGATGGGAGGATCCCACTTTTACCTGGGAGGATACAAACATGGAAGTCCAGTTTCTCAGATGGCCATGAGCCACAGGAAGGGCAGGGGGTG  
|||||  
chr1:12897935 (+) cggaaagaagcttaccatccactaccaggcctccctagtagcACTTGGAACTCCAGTTTCTCAGATGGCCATGAGCCACAGGAAGGGCAGGGGGTG  
|||||  
chr1:236183453 (-) CTATTGAGTTAGAAAGTATCCTGTGAAAGGAAATCTCTTTCCAGAGAGAGGttgaccagatgtaataataagaataatcattttctagcagatact  
|||||  
jet6 CTATTGAGTTAGAAAGTATCCTGTGAAAGGAAATCTCTTTCCAGAGAGAGGAAAGCAGGATGCTGCCCCTCTCTCAGCTCTGCTGGCA  
|||||  
chr1:7685302 (+) catggggaagcagtgaggggagactggggcggtggcctcaagggcaAGAGGAAAGCAGGATGCTGCCCCTCTCCTCCCTCTCAGCTCTGCTGGCA  
|||||  
chr1:10775898 (+) ATCTCTCCGGCAGCACCAATCCACACCAGAGCAACCAATCTCTCCACAGCACCAATCCGCTTCCACAGCACCAATCCACACCACCCACAGC  
|||||  
jet7 ATCTCTCCGGCAGCACCAATCCACACCAGAGCAAGTTTAAACCTCCCAAAGTCTGGGATTACAGGATGAGCCACTACGCTGGCAAAACCAT  
|||||  
chr1:21736011 (+) AGCCAGGATGCTCAATCTCCTGACCTTGTGATCTGCCACCTCGCCCTCCCAAAGTCTGGGATTACAGGATGAGCCACTACGCTGGCAAAACCAT  
|||||  
chr1:14443131 (+) gagtccctactgggagtgctgcttagtgagttgtgagaagagggccACTGTCTCCAGACCCAGAAATGGTAGATCCACTGACAGCTCCACCCTGTGCC  
|||||  
jet8 GGGTGTCTGGGGAAGCGGATTTGGTGTCTGTGGGAGAGGATTTGGGTACTGTCTCCAGACCCAGAAATGGTAGATCCACTGACAGCTCCACCCTGTGCC  
|||||  
chr1:10775905 (-) GGGTGTCTGGGGAAGCGGATTTGGTGTCTGTGGGAGAGGATTTGGTGTCTGTGGGAGAGGATTTGGTGTCTGCCCCTGTGGGAGT  
|||||  
chr1:11950173 (+) ATTCTCCATTTCTCGATTAACCAGAGATACAATGCACCTGCGGAAGccgcaaggGACCCCTGCCCAAGAAAGCCAGGTATTGTCCAGGATTTCCCCCACTG  
|||||  
jet9 ATTCTCCATTTCTCGATTAACCAGAGATACAATGCACCTGCGGAAGGGCTCACACCTGTAATCCAGCAGCTTTGGGAGGCTGAGCCAGGAGGATCACTTGAG  
|||||  
chr1:27642474 (+) CTCTAGTAAGTCTAAAGGGGTCATCACCAGGCCAAATGTAGTGGCTCACACCTGTAATCCAGCAGCTTTGGGAGGCTGAGCCAGGAGGATCACTTGAG  
|||||  
chr1:237674253 (+) CAACTGATTACAGACATCAATTAACGACAGGACTGACTGACATAAACACTTTGaggtGGTTCTAGCTGTTCTTTTACCCTTGCATGTACCTCCTGA  
|||||  
jet10 CAACTGATTACAGACATCAATTAATGACAGGACTGACTGACATAAACACTTTGGGACCCCTGCCCAAGAAAGCCAGGTATTGTCCAGGATTTCCCCCA  
|||||  
chr1:11950173 (+) GCCATTTCCATTTCTCGATTAACCAGAGATACAATGCACCTGCGGAAGccgcaGGGACCCCTGCCCAAGAAAGCCAGGTATTGTCCAGGATTTCCCCCA  
|||||  
chr1:12029841 (+) AGGCCAGCAAGAGACAGAATCTCTTTCAGTATCCTCCTTTAGCCAGGCGCAGTggttcatgctataatcccaacactttgggaggtgagggaggg  
|||||  
jet11 AGGCCAGCAAGAGACAGAATCTCTTTCAGTATCCTCCTTTAGCCAGGCGCAGTTTTCAGCTCCCTTCCCTTAAACTTTGAAAGGCTGATTCAAATTTG  
|||||  
chr1:14870538 (-) TATAATGAGATTTTCTTAAATTTCTGATTTCAATTTGTGCTTTTGTGAAGGTTTTCAGCTCCCTTCCCTTAAACTTTGAAAGGCTGATTCAAATTTG  
|||||  
chr1:14870538 (+) TTTTGAATCAGGCTTTTCAAAGTTTAGGGGAAGGAGTGCAAAACCTTTCCACAAGCACAATGAAATCAGAAATTTAAAGAAAATCTCATTATAAAA  
|||||  
jet12 CAGTTTATACCTCAAATTTCTCCACTCATTCGATTTGATTTATGCTTTCCACAAGCACAATGAAATCAGAAATTTAAAGAAAATCTCATTATAAAA  
|||||  
chr1:13975044 (+) CAGTTTATACCTCAAATTTCTCCACTCATTCGATTTGATTTATGCTTcttaagtcTTTTATAACCAAGAGCATCCCCACTTCTTCTGCCCTGT  
|||||  
chr1:35044966 (-) GTTAGATTTGGAGGAGTCAGAGGTGTTTGAACAGAAAGACTCCATCTGAATAGGGGCTGGATAAAATAAGACTGAGACCTACTGGCTGCATTTCCAG  
|||||  
jet13 GTTAGATTTGGAGGAGTCAGAGGTGTTTGAACAGAAAGACTCCATCTGAATAGGGGCTGGATAAAATAAGACTGAGACCTACTGGCTGCATTTCCAG  
|||||  
chr1:13975044 (+) CAGTTTATACCTCAAATTTCTCCACTCATTCGATTTGATTTATGCTTcttaagtcTTTTATAACCAAGAGCATCCCCACTTCTTCTGCCCTGT  
|||||  
chr1:16136046 (+) CCACCCGCTCGGCCCTCCCAAAGTGTGGGATTATAGGCGTGAGCCACCGCACCTGACTGACCTGATTTCTTCCAGGGCCAAAATCGGCCTTTGCAC  
|||||  
jet14 CCACCCGCTCGGCCCTCCCAAAGTGTGGGATTATAGGCGTGAGCCACCGCACCTGACTGACCTGATTTCTTCCAGGGCCAAAATCGGCCTTTGCAC  
|||||  
chr1:23235573 (+) CCTCGCCAGTGTGTTGGAGCTACGGCAATGTCATGTGGGAGGTGATGCTTATGGGAGCGCCCTACTGGGACATGACCAACCAGGATGTAAGTCT  
|||||  
chr1:16136046 (+) CCACCCGCTCGGCCCTCCCAAAGTGTGGGATTATAGGCGTGAGCCACCGCACCTGACTGACCTGATTTCTTCCAGGGCCAAAATCGGCCTTTGCAC  
|||||  
jet15 AATGAGAGTGTATGAAAGCCAGAGTCAAATGCAACTTTCTAATGACCGCACCTGACTGACCTGATTTCTTCCAGGGCCAAAATCGGCCTTTGCAC  
|||||  
chr1:20149297 (-) AATGAGAGTGTATGAAAGCCAGAGTCAAATGCAACTTTCTAATGgcttagctgataCCTCAGCATTTCCATAAAGTGTCTCTCAGAACCCCAAGAG  
|||||  
chr1:16146944 (-) GAGTCAAGATAAATATCTATGCTGGCTGGGCACCATGTTTACGCCCTGTAATCCCAACACTTTGGGAGGCCAAAGCAGGTGGATCACTGAGTCAAGGATGTA  
|||||  
jet16 TTGAGAGAATGACAAATTTAGGCAATCAATCCCAAGCACCTATGCTGCTGAAGGCCAACACTTTGGGAGGCCAAAGCAGGTGGATCACTGAGTCAAGGAG  
|||||  
chr1:29030464 (+) TTGAGAGAATGACAAATTTAGGCAATCAATCCCAAGCACCTATGCTGCTGAAGGGGACATAATTTGGTGGCCACTCAGGGAAGCATCTAGATTCCAAA  
|||||  
chr1:16146944 (-) AAGATAAATATCTATGCTGGCTGGGCACCATGTTTACGCCCTGTAATCCCAACACTTTGGGAGGCCAAAGCAGGTGGATCACTGAGTCAAGGATGTA  
|||||  
jet17 AAGATAAATATCTATGCTGGCTGGGCACCATGTTTACGCCCTGTAATCAGTTCCGCAAGTGAATGCTGCGATGCTATCGGACGTAATGGGATTTT  
|||||  
chr1:23117166 (+) TCTGTCTCTCCAGTGGCCAAACCCCATCTGCGAGGGATCTGGAGGAGTCCGCAAGTGAATGCTGCTGAAGGGGACATAATTTGGTGGCCACTCAGGGAAGCATCTAGATTCCAAA  
|||||  
chr1:20149275 (+) TGCTATGTACAACCTCGGGTCTGAGAGACACAGTTTAGGAAATGCTGAGGgatcaagctaagcATTAGAAAGTTGACTTTGACTCTGGCTTTCTAA  
|||||  
jet18 TGCTATGTACAACCTCGGGTCTGAGAGACACAGTTTAGGAAATGCTGAGGCTCTCAAAAAATGAAATGAAAGAGGAGGGAACACTTTCCAACCTCAT  
|||||  
chr1:26177864 (-) TCTCTGGTGAATTTACCAAACATTTAAAGAATTATACCAATCTTGCAGCTCTCTCAAAAAATGAAATGAAAGAGGAGGGAACACTTTCCAACCTCAT  
|||||  
chr1:21736003 (+) CCATGTTAGCCAGGATGGTCTCAATCTCTGACCTTGTGATCTGCCACCTCGGCCCTCCCAAAGTGTGGGATTACAGGATGAGCCACTACGCCCTGGCA  
|||||  
jet19 CCATGTTAGCCAGGATGGTCTCAATCTCTGACCTTGTGATCTGCCACCTCGGCCCTCCCAAAGTGTGGGATTACAGGATGAGCCACTACGCCCTGGCA  
|||||  
chr1:27642463 (-) TCAAGTATCTCTGCTCGCTCCCAAGTGTGGGATTACAGGATGAGCCACTTACATTTGGCCTGGTGTGACCCCTTTAGGACTTACTAGAGT  
|||||  
chr1:23117161 (+) TTGCTCTGTTCTCTCCAGTGGCCAAACCCGCATCTCGAGGGATCTGGAGGAGTTCGCCAGTGAATGATGCTGCTGCGATGCTATCGGACCTAATGGGA  
|||||  
jet20 TTGCTCTGTTCTCTCCAGTGGCCAAACCCGCATCTCGAGGGATCTGGAGGAGTTCGCCAGTGAATGATGCTGCTGCGATGCTATCGGACCTAATGGGA  
|||||  
chr1:64810459 (-) CTACCTCAAAAGGAAACATTTAGATTTGTTGGTGAATGTAATGATTAATAAGCTTTTATTATTATTAATGAGTTCAAACACCCTCTGGTGTCTTCT  
|||||  
chr1:23235559 (+) CACCTCGCCAGTGTGTTGGAGCTACGGCATTGCTCATGTGGGAGTGTGATGCTTATGGGAGCGGCCCTACTGGGACATGACCAACCAGGATGTAAGT  
|||||  
jet21 CACCTCGCCAGTGTGTTGGAGCTACGGCATTGCTCATGTGGGAGTGTGATGCTTATGGGAGCGGCCCTACTGGGACATGACCAACCAGGATGTAAGT  
|||||  
chr1:26177874 (+) AATGAGTTGGAAAGTGTCCCTCTCTTATTCTATTTTTTTGAGAGAGTCTGAAGGATTTGGTATAAATCTTTAAATGTTTGGTGAATTTACCAGAGA  
|||||  
chr1:27414417 (+) TCAATATGACGACAATAATGACTAAGAAATAGTGACAAGACTGTGGCTGGGcttctgctgtacatttgactgcctagaacaacacacaagaaga  
|||||  
jet22 TCAATATGACGACAATAATGACTAAGAAATAGTGACAAGACTGTGGCTGGGCGACATAAATTTGGTGGCCACTCAGGGAAGCATCTAGATTCCAAAAGC  
|||||  
chr1:29030466 (+) GAGAGAATGACAAATTTAGGCAATCAATCCCAAGCACCTATGCTGCTGAAGGGGACATAAATTTGGTGGCCACTCAGGGAAGCATCTAGATTCCAAAAGC  
|||||  
chr1:27667224 (+) CAGGATGGTCTTGTATCTCCTGACCTGCTGATCCACCCGCTCGGCCCTCCCAAAGTGTGGGATTACAGGATGTAAGCTACCACGCCACGCTTGTGTGCTT  
|||||  
jet23 CAGGATGGTCTGATCTCCTGACCTCGTATCCACCCGCTCGGCCCTCCCAAAGTGTGGGATTACAGGATGTAAGCTACCACGCCACGCTTGTGTGCTT  
|||||  
chr1:28083044 (+) TGAAGTATCTGCTGCTCATCTTCCCAAAGTGTGGGATTACAGGATGTAAGCTACCACGCCACGCTTGTGTGCTT  
|||||  
jet24 CAGGATGGTCTGATCTCCTGACCTCGTATCCACCCGCTCGGCCCTCCCAAAGTGTGGGATTACAGGATGTAAGCTACCACGCCACGCTTGTGTGCTT  
|||||  
chr1:246032954 (-) GTGCAGTGAAGTCAGAGATGGCGTGGTAGGATTTTGGGTTGGAGCTGTGAGGGCTGGGATTACAGGATGTAAGCTACCACGCCACGCTTGTGTGCTT  
|||||  
jet25 GTGCAGTGAAGTCAGAGATGGCGTGGTAGGATTTTGGGTTGGAGCTGTGAGGGCTGGGATTACAGGATGTAAGCTACCACGCCACGCTTGTGTGCTT  
|||||  
chr1:35044958 (-) TTTGGAGGAGTCAGAGGTGTTGAAACAGAAAGACTCCATCTTGAATAGGGGCTGGATAAAATAAGACTGAGACCTACTGGGCTGCATTTCCAGGAGATT  
|||||  
chr1:237674239 (-) CTGATTACAGACATCAATTAACGACAGGACTGACTGACATAAACACTTTGaggtGGTTCTAGCTGTTCTTTTACCCTTGCATGTACCTCCTGATCTC  
|||||  
jet26 GGCCCTCTCTGACTGGAAATTAATGACTAAGAAATAGTGACAAGACTGTGGCTGGGCGACATAAATTTGGTGGCCACTCAGGGAAGCATCTAGATTCCAAAAGC  
|||||  
chr1:246030768 (+) GGCCCTCTCTGACTGGAAATTAATGACTAAGAAATAGTGACAAGACTGTGGCTGGGCGACATAAATTTGGTGGCCACTCAGGGAAGCATCTAGATTCCAAAAGC  
|||||
