# Supplementary material for: Comprehensive structural variation genome map of individuals carrying complex chromosomal rearrangements
Source: PLoS Genet. 2019 Feb 8;15(2):e1007858. doi: 10.1371/journal.pgen.1007858 (PMC6368290; doi:10.1371/journal.pgen.1007858)
Supplement: S5 Table — (XLS) [file pgen.1007858.s007.xls]

## Sheet: Supplementary Table S5
			PE WGS - TIDDIT
	Average coverage	Average insert size	Read length
Case1	29	376	2*150
Case2	36.4219	381	2*150
Case3	43.6485	357	2*125
			MP WGS - TIDDIT
	Average coverage	Average insert size	Read length
Case1	3	5014	2*100
Case2	3.5	3452	2*100
Case3	3.1	2878	2*100
			10X Genomics Linked-read WGS - Long Ranger
	Long Ranger_version	Instrument_ids	gems_detected	mean_dna_per_gem	bc_on_whitelist	bc_mean_qscore	n50_linked_reads_per_molecule	corrected_loaded_mass_ng	snps_phased	genes_phased_lt_100kb	longest_phase_block	n50_phase_block	molecule_length_mean	molecule_length_stddev	number_reads	median_insert_size	mean_depth	zero_coverage	mapped_reads	pcr_duplication	on_target_bases	r1_q20_bases_fract	r1_q30_bases_fract	r2_q20_bases_fract	r2_q30_bases_fract	si_q20_bases_fract	si_q30_bases_fract	bc_q20_bases_fract	bc_q30_bases_fract	large_sv_calls	short_deletion_calls
Case1	2.1.2	ST-E00201	1344009	361162	0.940372	38.0903	6	0.849589	0.94148	0.548288	708660	69517	7801.4	30895.2	788121350	274	22.8586	0.00972699	0.727056	0.0792128		0.886314	0.795536	0.829037	0.723194	0.962973	0.933464	0.989707	0.970424	6	4081
Case2	2.1.2	ST-E00198	1663415	429913	0.946982	38.2319	15	1.01132	0.975323		4577733	517864	18225	20213	836236678	297	35.9368	0.00162902	0.952302	0.0760578		0.930938	0.863055	0.917251	0.845942	0.969981	0.945654	0.991194	0.975233	129	3937
Case3	2.1.2	ST-E00201	1314836	1.03814e+06	0.944965	38.2888	13	2.44209	0.987114	0.952799	5353667	1016376	35918.8	35243.1	815460932	323	34.9254	0.00890845	0.956177	0.0283405		0.936458	0.872965	0.920853	0.852383	0.966541	0.940698	0.991907	0.977074	16	4143
			Bionano BspQI - Bionano Access
	Number of molecules	Molecule N50 (Kb)	Labels per 100 kb
Case1	4460963	220	13
Case2	10446567	167	13
Case3	6034461	212	14
			Bionano BssSI - Bionano Access
	Number of molecules	Molecule N50 (Kb)	Labels per 100 kb
Case1	4709962	171	14
Case2	10759938	173	14
Case3	6900132	216	13
